# Supplementary material
Source: PubMed Central journal article supplement (PMC4376483)
Supplement: Supp_Figure1.pdf [file Supp_Figure1.pdf]

## Supplementary Data

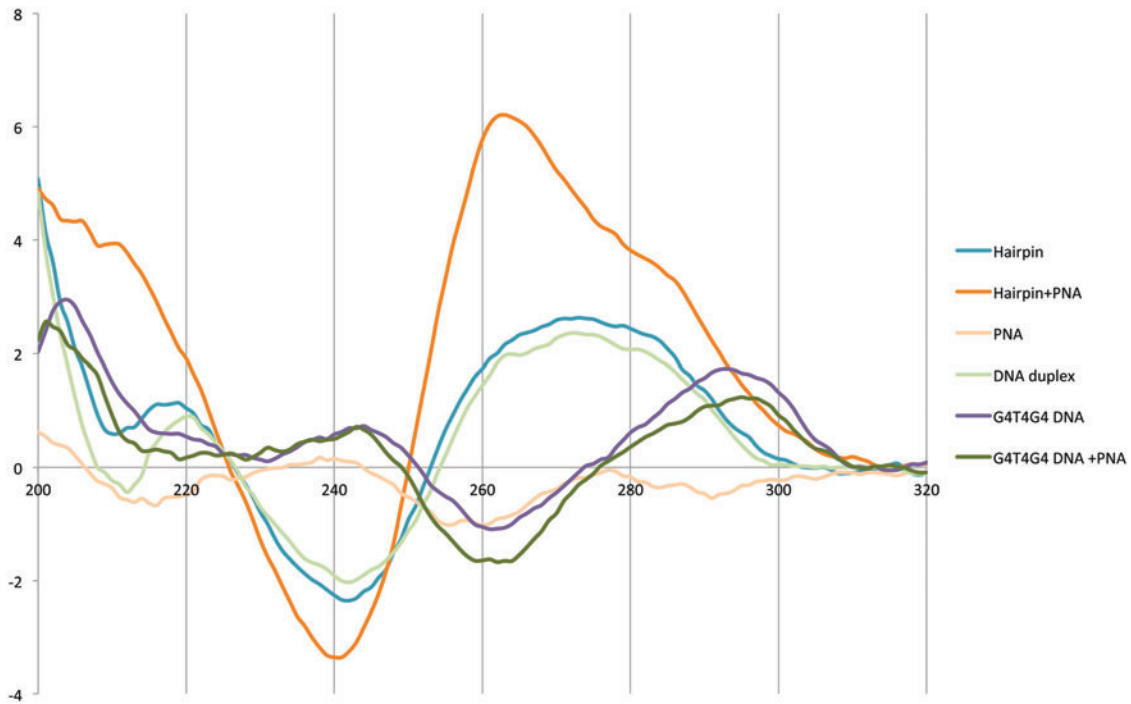

**SUPPLEMENTARY FIG. S1.** Circular dichroism (CD) spectra of peptide nucleic acids (PNA)-DNA complexes. The minimum at 265 nm and the maximum at 240 and 295 nm are consistent with the presence of antiparallel quadruplex in  $G_4T_4G_4$  PNA and  $G_4T_4G_4$  DNA samples. In contrast, the increase in the minimum at 240 nm and the maximum at 265 nm after addition of  $G_4T_4G_4$  PNA to hairpin DNA are consistent with the presence of parallel quadruplex in these samples (compare *blue* and *gold spectra*). However, the presence of a large portion of DNA duplex in the stem of the hairpin affects the total spectra of these samples.
