# Supplementary material
Source: PubMed Central journal article supplement (PMC4376483)
Supplement: Supp_Figure2.pdf [file Supp_Figure2.pdf]

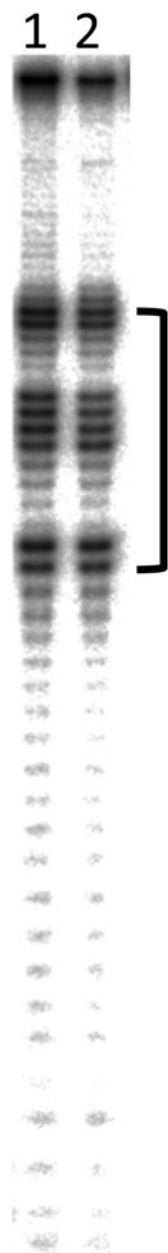

**SUPPLEMENTARY FIG. S2.** Osmium tetroxide ( $\text{OsO}_4$ ) probing of PNA–hairpin complexes. Hairpin DNA with (lane 2) or without (lane 1)  $\text{G}_4\text{T}_4\text{G}_4$  PNA was probed with  $\text{OsO}_4$  that reacts with thymidines in single-stranded regions. The results show that only thymidine in the loop (marked with *bracket*) are reactive proving that PNA binding does not result in unwinding of the hairpin's DNA stem.
