# Supplementary material
Source: PubMed Central journal article supplement (PMC4376483)
Supplement: Supp_Figure3.pdf [file Supp_Figure3.pdf]

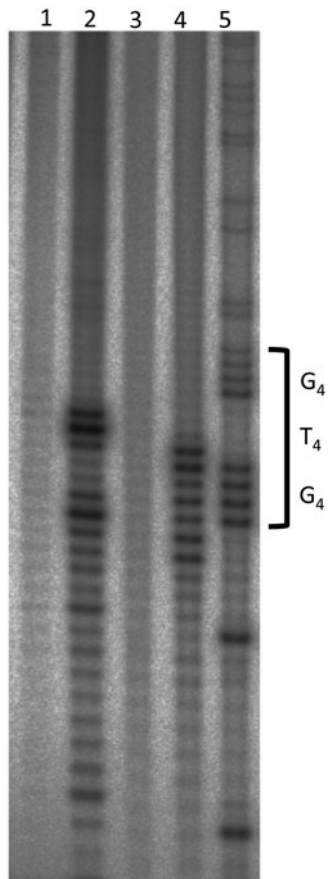

**SUPPLEMENTARY FIG. S3.** S1 nuclease probing of PNA–plasmid complexes. pGT4 plasmid with (lanes 2 and 4) or without (lanes 1 and 3) G<sub>4</sub>T<sub>4</sub>G<sub>4</sub> PNA was probed with S1 nuclease before (lanes 1 and 2) or after (lanes 3 and 4) linearization with restriction enzymes and <sup>32</sup>P labeling. Lane 5 is the DNA sequencing lane showing the positions of guanines. G<sub>4</sub>T<sub>4</sub>G<sub>4</sub> insert marked with the *bracket*.
